# Supplementary material for: IRF4 is a novel mediator for neuronal survival in ischaemic stroke
Source: PubMed Central journal article supplement (PMC4013523; doi:10.1038/cdd.2014.9), 2014-02-07
Supplement: cdd20149x1.pdf [file cdd20149x1.pdf]

## **IRF4 is a Novel Mediator for Neuronal Survival in Ischemic Stroke**

Sen Guo<sup>1,2,\*</sup>, Zuo-Zhi Li<sup>3\*</sup>, Ding-Sheng Jiang<sup>1,2\*</sup>, Yan Yun Lu<sup>1,2</sup>, Yi Liu<sup>4</sup>, Lu Gao<sup>6</sup>,  
Shu-Min Zhang<sup>1,2</sup>, Hao Lei<sup>5</sup>, Li-Hua Zhu<sup>1,2</sup>, Xiao-Dong Zhang<sup>4</sup>, De-Pei Liu<sup>3#</sup>,  
Hongliang Li<sup>1,2,#</sup>

1 Department of Cardiology, Renmin Hospital of Wuhan University, Wuhan 430060, China; 2 Cardiovascular Research Institute, Wuhan University, Wuhan 430060, China; 3 State Key Laboratory of Medical Molecular Biology, Department of Biochemistry and Molecular Biology, Institute of Basic Medical Sciences, Chinese Academy of Medical Sciences & Peking Union Medical College, Beijing 100005, China; 4 College of Life Sciences, Wuhan University, Wuhan 430072, China; 5 Wuhan Center for Magnetic Resonance, State Key Laboratory of Magnetic Resonance and Atomic and Molecular Physics, Wuhan Institute of Physics and Mathematics, Chinese Academy of Sciences, Wuhan, China. 6 Department of Cardiology, Institute of Cardiovascular Disease, Union Hospital, Tongji Medical College, Huazhong University of Science and Technology, Wuhan, 430022, China. (\* Sen Guo, Zuo-Zhi Li and Ding-Sheng Jiang are co-first authors.)

Correspondence and requests for materials should be addressed to H.L.L

(E-mail: lihl@whu.edu.cn)

Supplementary Figure S1-S6

Supplementary Table S1-S4

## Supplementary Figure S1

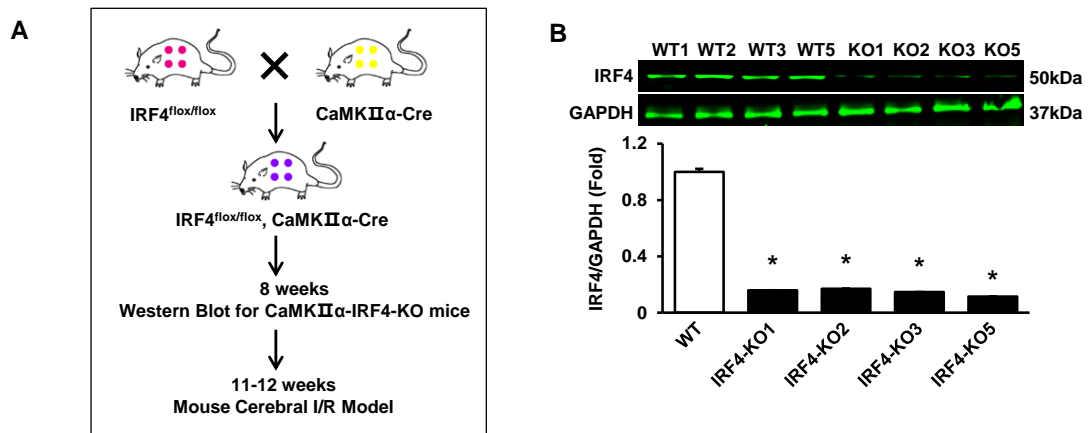

**Supplementary Figure S1. Generation of neuron-specific IRF4-knockout mice. (a)** Schematic representation of generation of neuron-specific IRF4-knockout (IRF4-KO) mice. **(b)** Immunoblotting of IRF4 in the brain lysates from IRF4-KO mice (left) and the relative IRF4 levels (right). \* $P < 0.0001$ ,  $< 0.0001$ ,  $< 0.0001$ ,  $< 0.0001$  versus wild type (WT), respectively, unpaired Student's t-test. The values are the means  $\pm$  SE of three independent experiments in triplicate.

## Supplementary Figure S2

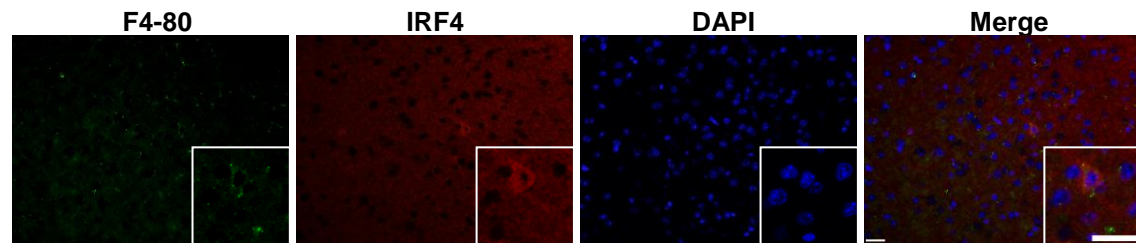

### **Supplementary Figure S2. IRF4 expresses at a relatively low level in microglia.**

Representative immunofluorescence images of IRF4 (red), F4-80 (green) and DAPI (blue) in the brains of wild-type mice **out of three independent experiments**. Scale bar: 20  $\mu\text{m}$ .

**Supplementary Figure S3**

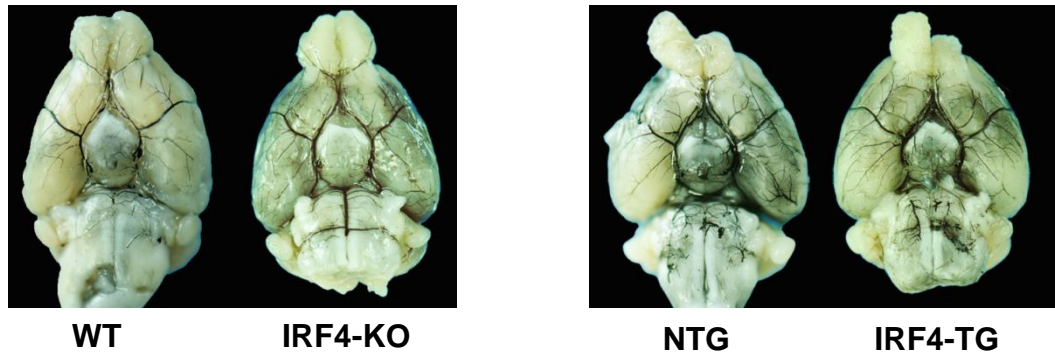

**Supplementary Figure S3. Genetic manipulations of IRF4 do not impact the integrity of cerebral vasculature.** Representative images showing the integrity of the cerebral vasculature stained with India ink in WT, IRF4-KO, NTG, and IRF4-TG mice **out of three independent experiments.**

## Supplementary Figure S4

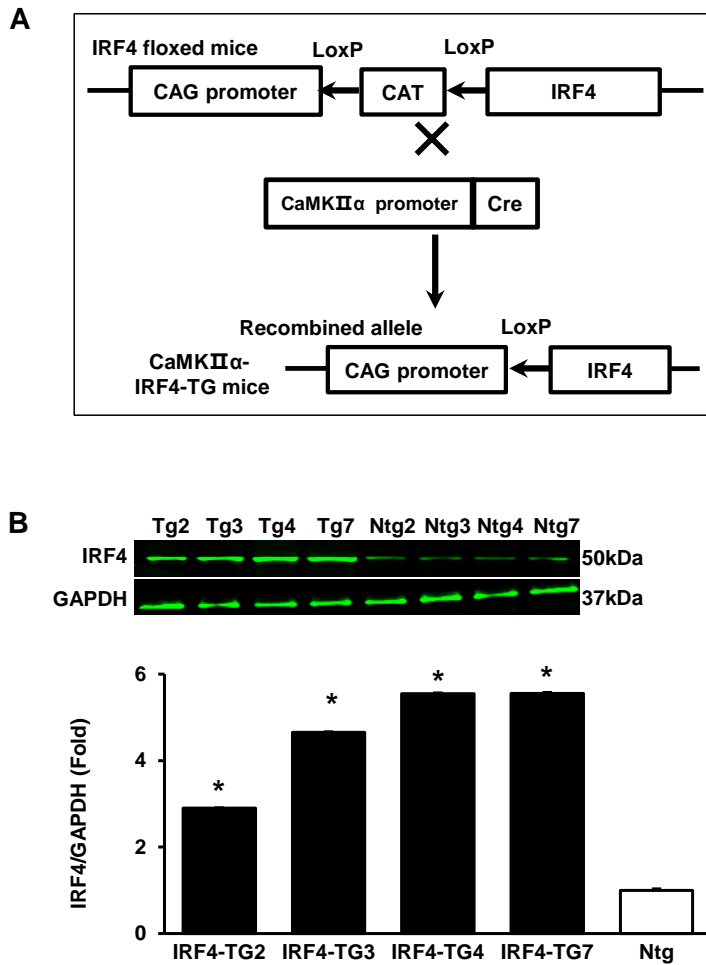

### Supplementary Figure S4. Generation of neuron-specific IRF4-transgenic mice.

(a) Schematic representation of generation of neuron-specific IRF4-transgenic (IRF4-TG) mice. (b) Immunoblotting of IRF4 in the brain lysates from IRF4-TG mice (left) and the relative IRF4 levels (right). \* $P < 0.0001$ ,  $< 0.0001$ ,  $< 0.0001$ ,  $< 0.0001$  compared with non-transgenic mice (NTG), respectively, unpaired Student's t-test. The values are the means  $\pm$  SE of three independent experiments in triplicate.

## Supplementary Figure S5

**A**

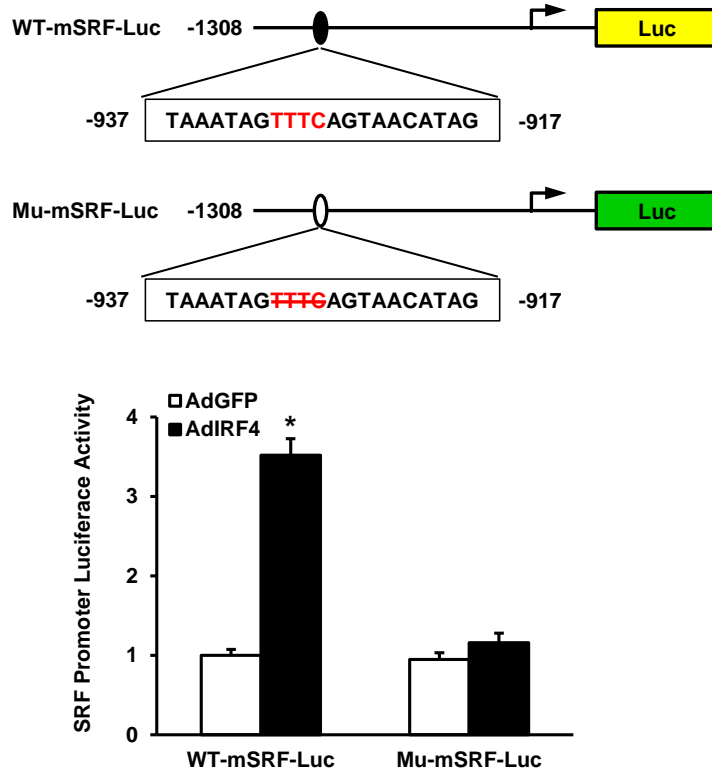

**B**

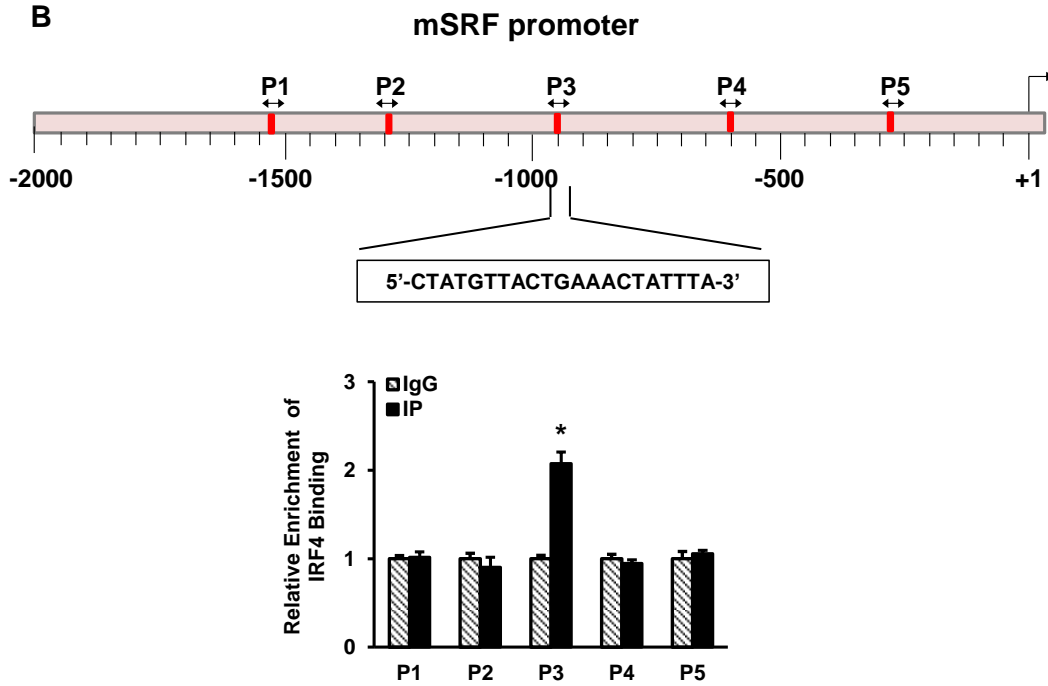

**Supplementary Figure S5. IRF4 binds to the promoter region of SRF.** (a) The primary mouse cortical neurons were transfected with the wild-type (WT-mSRF-Luc) or mutant SRF promoter (Mu-mSRF-Luc) and infected with AdGFP or AdIRF4 prior to the OGD treatment. The luciferase activity was assessed and quantified (bottom panel). The values are the means  $\pm$  SE of three independent experiments. \*P<0.0001 versus AdGFP. NS: not significant, unpaired Student's t-test. (b) The putative IRF4 binding sites (P3) were identified in the promoter region of the murine SRF gene (upper panel). P1, P2, P4, and P5 served as negative controls. Lower panel: IRF4 was enriched in the P3 region as shown by chromatin immunoprecipitation (ChIP). \*P=0.0015 versus IgG. The values are the means  $\pm$  SE of three to five independent experiments in triplicate, unpaired Student's t-test.

## Supplementary Figure S6

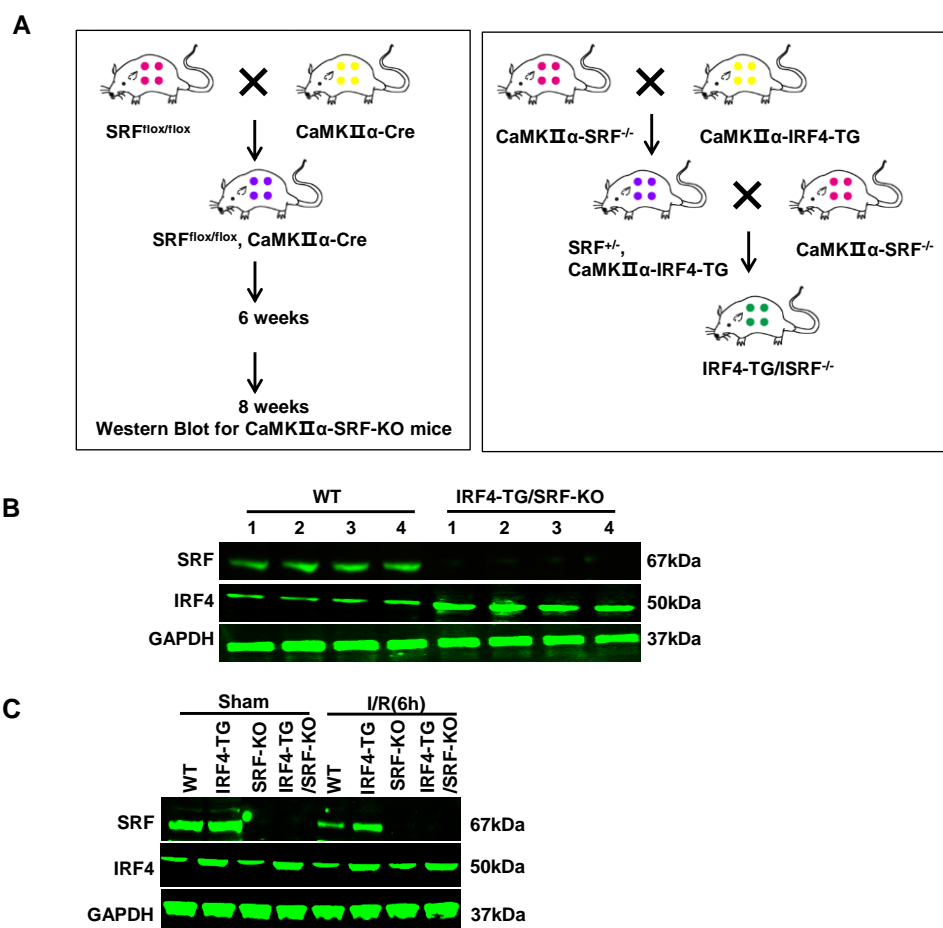

**Supplementary Figure S6. Generation of neuron-specific SRF knockout (SRF-KO) mice and IRF4-TG/SRF-KO mice.** (a) Schematic representation of generation of SRF-KO (left panel) and IRF4-TG/SRF-KO mice (right panel). (b) Immunoblotting of SRF and IRF4 in WT and IRF4-TG/SRF-KO mice. GAPDH served as a loading control. (c) IRF4-TG, SRF-KO and IRF4nTG/SRF-KO mice were subjected to a sham operation or 24-h I/R. Using immunoblotting, the levels of SRF and IRF4 were detected in brains prior to and after I/R. GAPDH served as a loading control.



**Supplementary Table S1**

|                               | <b>WT</b>    | <b>IRF4-KO</b> | <b>NTG</b>   | <b>IRF4-TG</b> |
|-------------------------------|--------------|----------------|--------------|----------------|
| <b>pH</b>                     | 7.333±0.032  | 7.263±0.056    | 7.348±0.015  | 7.323±0.027    |
| <b>pO<sub>2</sub> (mmHg)</b>  | 125.50±2.02  | 126.00±5.73    | 116.75±2.63  | 125.25±4.66    |
| <b>pCO<sub>2</sub> (mmHg)</b> | 32.25±2.92   | 33.25±3.45     | 35.50±3.43   | 31.50±2.25     |
| <b>DBP (mmHg)</b>             | 105.98±1.78  | 106.59±2.15    | 104.40±2.15  | 105.41±2.68    |
| <b>SBP (mmHg)</b>             | 132.73±1.90  | 137.64±3.17    | 134.72±1.57  | 136.24±0.96    |
| <b>Heart rate (b.p.m.)</b>    | 616.08±23.46 | 610.92±9.03    | 640.69±13.06 | 609.64±13.31   |

**Supplementary Table S1. Physiological variables of experimental groups before MCAO.** Blood gas analysis, blood pressure, and heart rate were comparable between groups. Data represent mean ± SE from 8 mice of each genotype, post hoc Tukey's test with Bonferroni correction. WT: wild-type; KO: neuron-specific IRF4 knockout; NTG: non-transgenic; TG: neuron-specific IRF4 transgenic. SBP: systolic blood pressure; DBP: diastolic blood pressure.

## Supplementary Table 2

### Primers used for Real-time PCR.

| <b>Genes</b>          | <b>Sequence 5'-3'</b>    |
|-----------------------|--------------------------|
| <b>SRF-FWD-A</b>      | TTCAGCAAGAGGAAGACGGGCA   |
| <b>SRF-REV-A</b>      | AGTTTGCGGGTGGCAAAGGT     |
| <b>BDNF-FWD-B</b>     | AACGTCCACGGACAAGGCAACTT  |
| <b>BDNF-REV-B</b>     | CCAAAGGCACTTGACTGCTGAGCA |
| <b>c-fos-FWD-A</b>    | CGGGTTTCAACGCCGACTA      |
| <b>c-fos-REV-A</b>    | TGGCACTAGAGACGGACAGAT    |
| <b>fos-B-FWD-B</b>    | AGGAACGCCTGGAGTTTGTCTT   |
| <b>fos-B-REV-B</b>    | AGCCGTCTTCCTTAGCCGATGT   |
| <b>Junb-FWD-A</b>     | CTATCGGGGTCTCAAGGGTC     |
| <b>Junb-REV-A</b>     | CTGTTGGGGACGATCAAGC      |
| <b>Egr1-FWD-A</b>     | TATGAGCACCTGACCACAGAG    |
| <b>Egr1-REV-A</b>     | GCTGGGATAACTCGTCTCCA     |
| <b>Egr2-FWD-A</b>     | TCAGTGGTTTTATGCACCAGC    |
| <b>Egr2-REV-A</b>     | GAAGCTACTCGGATACGGGAG    |
| <b>Egr3-FWD-B</b>     | TTGCCTGACAATCTGTACCCC    |
| <b>Egr3-REV-B</b>     | TAATGGGCTACCGAGTCGCT     |
| <b>Cyr61-FWD-B</b>    | CTCCAGAATCTACCAAACGGG    |
| <b>Cyr61-REV-B</b>    | CGTCCAGGGAGTCCTTAATGC    |
| <b>Ctgf -FWD-B</b>    | AGACCTGTGGGATGGGCAT      |
| <b>Ctgf -REV-B</b>    | GCTTGGCGATTTTAGGTGTCC    |
| <b>Gelsolin-FWD-A</b> | ACCAGCTCTGCTGCATCAGGTA   |
| <b>Gelsolin-REV-A</b> | GCACAGGCACCAGGTCAAACCTT  |
| <b>Psd95-FWD-A</b>    | ACCAGAAGAGTATAGCCGATTCG  |
| <b>Psd95-REV-A</b>    | GGTCTTGTCGTAGTCAAACAGG   |

---

|                     |                         |
|---------------------|-------------------------|
| <b>Sema3a-FWD-A</b> | TGGCAAAGCCTGTGCAGAATGC  |
| <b>Sema3a-REV-A</b> | TGGTGCTGCAAGTCAGAGCAGT  |
| <b>Ngf-FWD-B</b>    | AGACTCCACTCACCCCGTG     |
| <b>Ngf-REV-B</b>    | GGCTGTGGTCTTATCTCCAAC   |
| <b>Cdk5-FWD-A</b>   | GGGAAGGCACCTATGGAAGTGG  |
| <b>Cdk5-REV-A</b>   | CAGCCTGACACGCTTCAGAG    |
| <b>Actb-FWD-A</b>   | GTGACGTTGACATCCGTAAAGA  |
| <b>Actb-REV-A</b>   | GCCGGACTCATCGTACTCC     |
| <b>Actg2-FWD-A</b>  | TGAGATGGCCACAGCAGCTTCA  |
| <b>Actg2-REV-A</b>  | CCATGCCAATGAAGGAAGGCTGG |
| <b>Npas4-FWD-A</b>  | TGCTCTGGATGCTGATCGCCTT  |
| <b>Npas4-REV-A</b>  | AGCGGTGAACACAGGGTTTCCT  |
| <b>Nur77-FWD-B</b>  | CTCCCCGAGCCAGACTTATG    |
| <b>Nur77-REV-B</b>  | TGTCACGGTTCGGAGAGGT     |
| <b>BCL2-FWD-B</b>   | CGTCGTGACTTCGCAGAGAT    |
| <b>BCL2-REV-B</b>   | TGACATCTCCCTGTTGACGC    |
| <b>GAPDH-FWD-A</b>  | ACTCCACTCACGGCAAATTC    |
| <b>GAPDH-REV-A</b>  | TCTCCATGGTGGTGAAGACA    |

---

### Supplementary Table S3

#### Primers used for ChIP assays

| <b>Genes</b>    | <b>Sequence 5'-3'</b>  |
|-----------------|------------------------|
| <b>m-SRF-F1</b> | TCCACATTGCTGTTTCATCAC  |
| <b>m-SRF-R1</b> | GCTGGTAGTCCTGGGTTCTA   |
| <b>m-SRF-F2</b> | GCTCCTTCCTCTCTGATGACT  |
| <b>m-SRF-R2</b> | CACACAAACAAGTGACCTGGT  |
| <b>m-SRF-F3</b> | CAATCCTCCTGTCTCAACCTC  |
| <b>m-SRF-R3</b> | GAGTCTGAATCTTTGCTCCAAG |
| <b>m-SRF-F4</b> | GGATGATGAACGATGTGACC   |
| <b>m-SRF-R4</b> | AGGGCAGGGATAGATTGGA    |
| <b>m-SRF-F5</b> | CAACACTCCACTACTCTCCAAC |
| <b>m-SRF-R5</b> | CATAGACATACCGAACTCGCT  |

## Supplementary Table S4

### Primers used for vector construction in luciferase reporter gene assays.

| <b>Genes</b>      | <b>Sequence 5'-3'</b>               |
|-------------------|-------------------------------------|
| <b>SRF-IRF4-F</b> | GTTGGTACCTCAAGTTGATGCCAAACCAG       |
| <b>SRF-IRF4-R</b> | GACAAGCTTCTCACTTTCCTGCCCTATG        |
| <b>SRF-IRF-MF</b> | GCCAGATTTAAATAGAGTAACATAGAAGTGCAAGA |
| <b>SRF-IRF-MR</b> | ACTTCTATGTTACTCTATTTAAATCTGGCCGGACG |
